# Supplementary material for: TALEN-Mediated Gene Editing of slc24a5 (Solute Carrier Family 24, Member 5) in Kawakawa, Euthynnus affinis
Source: MDPI journal article supplement (doi:10.3390/jmse9121378), 2021-12-04
Supplement: s1 [file s1]

|      |                                                                              |   |   |   |   |   |   |   |   |   |   |   |   |   |   |   |   |   |   |   |   |   |   |
|------|------------------------------------------------------------------------------|---|---|---|---|---|---|---|---|---|---|---|---|---|---|---|---|---|---|---|---|---|---|
| 1    | M                                                                            | G | T | L | S | A | V | T | H | T | A | C | A | G | Y | H | L | P | E | T | G | S | L |
| 1    | <u>atg</u> gggactctgagcgccgtcacacacacagcttgtgcgggatatcatttgcctgaaaccggttcctt |   |   |   |   |   |   |   |   |   |   |   |   |   |   |   |   |   |   |   |   |   |   |
| 24   | K                                                                            | A | K | S | P | P | T | Q | S | S | A | M | E | D | E | I | A | A | L | V | V | D | N |
| 70   | aaagcgaaaagcccccccacccaaagtccagccatggaagatgaaatcgccgcactgggtgttgacaac        |   |   |   |   |   |   |   |   |   |   |   |   |   |   |   |   |   |   |   |   |   |   |
| 47   | G                                                                            | S | G | M | C | K | A | G | F | A | G | D | D | A | P | R | A | V | F | P | S | I | V |
| 139  | ggatccggtatgtgcaaagccggatttgccggagacgatgcccctcgtgctgtcttccccctccatcgtc       |   |   |   |   |   |   |   |   |   |   |   |   |   |   |   |   |   |   |   |   |   |   |
| 70   | G                                                                            | R | P | R | H | Q | G | V | M | V | G | M | G | Q | K | D | S | Y | V | G | D | E | A |
| 208  | ggtcgccccaggcatcagggagtgtggtgggtatgggccagaaggacagctacgttgggtgacgaagcc        |   |   |   |   |   |   |   |   |   |   |   |   |   |   |   |   |   |   |   |   |   |   |
| 93   | Q                                                                            | S | K | R | G | I | L | T | L | K | Y | P | I | E | H | G | I | V | T | N | W | D | D |
| 277  | cagagcaagagaggtatcctgaccctgaagtaccccatcgagcacggtattgtgaccaactgggatgac        |   |   |   |   |   |   |   |   |   |   |   |   |   |   |   |   |   |   |   |   |   |   |
| 116  | M                                                                            | E | K | I | W | H | H | T | F | Y | N | E | L | R | V | A | P | E | E | H | P | V | L |
| 346  | atggagaagatctggcatcacaccttctacaatgagctgagagttgcccctgaggagcaccctgtcctg        |   |   |   |   |   |   |   |   |   |   |   |   |   |   |   |   |   |   |   |   |   |   |
| 139  | L                                                                            | T | E | A | P | L | N | P | K | A | N | R | E | K | M | T | Q | I | M | F | E | T | F |
| 415  | ctcacagagggccctctgaaccccaaagccaacagggagaagatgacccagatcatgttcgagaccttc        |   |   |   |   |   |   |   |   |   |   |   |   |   |   |   |   |   |   |   |   |   |   |
| 162  | N                                                                            | T | P | A | M | Y | V | A | I | Q | A | V | L | S | L | Y | A | S | G | R | T | T | G |
| 484  | aacacccccgccatgtacgttgccatccaggctgtgctgtccctgtatgcctctggctcgtaaccacgggt      |   |   |   |   |   |   |   |   |   |   |   |   |   |   |   |   |   |   |   |   |   |   |
| 185  | I                                                                            | V | M | D | S | G | D | G | V | T | H | T | V | P | I | Y | E | G | Y | A | L | P | H |
| 553  | attgtcatggactccgggtgatgggtgacccacagtgcccattctacgagggctacgccctgccccac         |   |   |   |   |   |   |   |   |   |   |   |   |   |   |   |   |   |   |   |   |   |   |
| 208  | A                                                                            | I | L | R | L | D | L | A | G | R | D | L | T | D | Y | L | M | K | I | L | T | E | R |
| 622  | gccatcctgcgtctggacttggccggccgcgacctcacagactacctcatgaagatcctgacagagcgt        |   |   |   |   |   |   |   |   |   |   |   |   |   |   |   |   |   |   |   |   |   |   |
| 231  | G                                                                            | Y | S | F | T | T | T | A | E | R | E | I | V | R | D | I | K | E | K | L | C | Y | V |
| 691  | ggctactccttcaccaccacagccgagagggaaatcgtgcgtgacatcaaggagaagctctgctatgtc        |   |   |   |   |   |   |   |   |   |   |   |   |   |   |   |   |   |   |   |   |   |   |
| 254  | A                                                                            | L | D | F | E | Q | E | M | G | T | A | A | S | S | S | S | L | E | K | S | Y | E | L |
| 760  | gccctggacttcgagcaggaatgggcactgctgcctcctcctcctcctggagaagagctacgagctg          |   |   |   |   |   |   |   |   |   |   |   |   |   |   |   |   |   |   |   |   |   |   |
| 277  | P                                                                            | D | G | Q | V | I | T | I | G | N | E | R | F | R | C | P | E | A | L | F | Q | P | S |
| 829  | cctgacggacaggtcatcaccattggcaatgagaggttccgttgccccgagggccctcttccagccttcc       |   |   |   |   |   |   |   |   |   |   |   |   |   |   |   |   |   |   |   |   |   |   |
| 300  | F                                                                            | L | G | M | E | S | C | G | I | H | E | T | T | Y | N | S | I | M | K | C | D | V | D |
| 898  | ttcctcggatggagtcctgcggaatccacgagaccacctacaacagcatcatgaagtgcgacgtcgat         |   |   |   |   |   |   |   |   |   |   |   |   |   |   |   |   |   |   |   |   |   |   |
| 323  | I                                                                            | R | K | D | L | Y | A | N | T | V | L | S | G | G | T | M | Y | P | G | I | A | D |   |
| 967  | atccgtaaggacctgtacgccaacacccgtgctgtctgtgaggtaccaccatgtaccccggcacgcggac       |   |   |   |   |   |   |   |   |   |   |   |   |   |   |   |   |   |   |   |   |   |   |
| 346  | R                                                                            | M | Q | K | E | I | T | A | L | A | P | S | T | M | K | I | K | I | I | A | S | P | E |
| 1036 | aggatgcagaaggagatcacagccctggccccatccaccatgaagatcaagatcattgcctcacctgag        |   |   |   |   |   |   |   |   |   |   |   |   |   |   |   |   |   |   |   |   |   |   |
| 369  | R                                                                            | K | Y | S | V | W | I | G | G | S | I | L | A | S | L | S | T | F | Q | Q | M | W | I |
| 1105 | cgtaaatactctgtctggatcggaggctccatcctggcctccctgtccaccttccagcagatgtggatc        |   |   |   |   |   |   |   |   |   |   |   |   |   |   |   |   |   |   |   |   |   |   |
| 392  | S                                                                            | K | Q | E | Y | D | E | S | G | P | S | I | V | H | R | K | C | F | * |   |   |   |   |
| 1174 | agcaagcaggagtacgatgagtcgggcccctccatcgtccaccgcaaagtcttctaa                    |   |   |   |   |   |   |   |   |   |   |   |   |   |   |   |   |   |   |   |   |   |   |

Cagactgttctcctccccctccccaaacgccccaaacaacttcagctctgtgcaaaacaaccacacacaccacatttctcata  
 cacactcaggcgagagcctagacgaccaactcattggcatggcttcagttatTTTTTggcgcttgactcaggattttaaaaaactgg  
 aacgatgaaggagacagtaaatgtTTTTTggctagggttaaaaaatagaccccagggttctgcagttgcacatctggggacttaaaaaatg  
 tacattttgtttttctttgagtcattccaaatgtttgttaactgcatattgt

**Figure S5.** A complete nucleotide sequence along with translated amino acid sequence of kawakawa *beta-actin* gene. The number on left side represent the corresponding position of the amino acid and cDNA residues, respectively. x – Start codon; x – stop codon; x – 3' untranslated region.
