# Supplementary material for: TALEN-Mediated Gene Editing of slc24a5 (Solute Carrier Family 24, Member 5) in Kawakawa, Euthynnus affinis
Source: MDPI journal article supplement (doi:10.3390/jmse9121378), 2021-12-04
Supplement: s1 [file s1]

**Figure S1.** cDNA and genome structure of *slc24a5* in kawakawa, *Euthynnus affinis*.

|            |                                                                 |     |
|------------|-----------------------------------------------------------------|-----|
| SLC_cDNA   | ATGGGGAATCTCTCTCTCTCTCTCTTTGCAGCTTGTTAGTTGTAGTGTAGTGTAGATGCA    | 60  |
| SLC_genome | -----AATCTCTCTCTCTCTCTCTTTGCAGCTTGTTAGTTGTAGTGTAGTGTAGATGCA     | 54  |
|            | *****                                                           |     |
| SLC_cDNA   | GAGCTAACACACAGCTTCAAGCCACATTTTTTTTTTACCTTTGCATGCTTGCCTATGATTTC  | 120 |
| SLC_genome | GAGCTAACACACAGCTTCAAGCCACATTTT--TTACCTTTGCATGCTTGCCTATGATTTC    | 111 |
|            | *****                                                           |     |
| SLC_cDNA   | CTTAGAATAATTCCTTCTCTCTCTTTTTTTTTTT--ACTCACCATGAATAAGGTTGCAGC    | 177 |
| SLC_genome | CTTAGAATAATTCCTTCTCTCTCTTTTTTTTTTTTTTTTACTCACCATGAATAAGGTTGCAGC | 171 |
|            | *****                                                           |     |
| SLC_cDNA   | TCTGCAGAAAAAGAAAAGAAAAGATTTTATTCCTTACTTCTGCGGATTTGTACTATTTTT    | 237 |
| SLC_genome | TCTGCAGAAAAAGAAAAGAAAAGATTTTATTCCTTACTTCTGCGGATTTGTACTATTTTT    | 231 |
|            | *****                                                           |     |
| SLC_cDNA   | ATATTGCACGGTCCATCTTGTATCATTACAGCAAAAACAACTCAGGAAACCCACTCTGT     | 297 |
| SLC_genome | ATATTGCACGGTCCATCTTGTATCATTACAGCAAAAACAACTCAGGAAACCCACTCTGT     | 291 |
|            | *****                                                           |     |
| SLC_cDNA   | CAGGGTGCGCCGGGCTCTTG-----                                       | 317 |
| SLC_genome | CAGGGTGCGCCGGGCTCTTGTAAGAACATTTGTGTGTGTTTATGATAATAAAGTCTATT     | 351 |
|            | *****                                                           |     |
| SLC_cDNA   | -----                                                           |     |
| SLC_genome | TTAAAGCATTTTTTTAAACCTCCTATTTTTCCTACAGAGTGTAAGTGTAATTGTATAACC    | 411 |
|            | -----                                                           |     |
| SLC_cDNA   | -----                                                           |     |
| SLC_genome | TATTCAACGTGTAATTATACATGTCACGGCTCATTTTTGTGCTTTACAAAGTGTGGGTAA    | 471 |
|            | -----                                                           |     |
| SLC_cDNA   | -----                                                           |     |
| SLC_genome | TCAATTGTGGCCAGCAACTGTGACAGTGTGCTCCACTAATTCTCGTGTCTTATTGGC       | 531 |
|            | -----                                                           |     |
| SLC_cDNA   | -----                                                           |     |
| SLC_genome | ATGAAATTCCATGTAAGTCCATGTAAGAGTTTTGACAATGCAATAGGCGGGCTGCTTGT     | 591 |
|            | -----                                                           |     |
| SLC_cDNA   | -----                                                           |     |
| SLC_genome | TTTTTTGGGGTGACAGGTGTTTGTGCTTGATGAGCACTGAACAATATGTGTGCTGCTG      | 651 |
|            | -----                                                           |     |
| SLC_cDNA   | -----AGAATGAGCCAGAATGCATCTTACCACAGTCCTCTGAGTTTCTGACGGCTTCT      | 711 |
| SLC_genome | TTTCAGAGAATGAGTCAGAATGCATCTTACCACAGTCCTCTGAGTTTCTGACGGCTTCT     | 711 |
|            | *****                                                           |     |
| SLC_cDNA   | TCACGGTGCAGGAGAGAAAGGATGGAGGGCTTGTCATTTATTTTATGCTTATTTTCTACA    | 431 |
| SLC_genome | TCACGGTGCAGGAGAGAAAGGATGGAGGGCTTGTCATTTATTTTATGCTTATTTTCTACA    | 771 |
|            | *****                                                           |     |
| SLC_cDNA   | TGCTTTTGGCTGTCGCAATAGCCTGCGATGATTACTTTCTGCCATCCTTAGAAGTGATCA    | 491 |
| SLC_genome | TGCTTTTGGCTGTCGCAATAGTCTGCGATGATTACTTTCTGCCATCCTTAGAAGTGATCA    | 831 |
|            | *****                                                           |     |
| SLC_cDNA   | GTGATC-----                                                     | 499 |
| SLC_genome | GTGATCGTAAGTTACATGAATTGAATTATGGTGATGTTGTGTGTGTGTGTGTGTGT        | 891 |
|            | *****                                                           |     |

|            |                                                               |      |
|------------|---------------------------------------------------------------|------|
| SLC_cDNA   | -----                                                         |      |
| SLC_genome | AAGGGATTGTGGGTAGGGTCAATGCATCATTACATAATCTGTAATGTAAATTGGCATTAT  | 951  |
| SLC_cDNA   | -----                                                         |      |
| SLC_genome | AGGATTTAGCCTGTAACCTGCATTAAATCCTTCATAGTTTTCTAACAGCCTCCATGTATA  | 1011 |
| SLC_cDNA   | -----                                                         |      |
| SLC_genome | TTCCATTATAACATTAGACTAGGTTGTAGCTGTTTTAATCAGGGATATGTTTTCAGAGTT  | 1071 |
| SLC_cDNA   | -----                                                         |      |
| SLC_genome | ACTTTATGCTTTACAGTAGGCCTGCAACTAATGATTATTTCCAATATCAATTCATCTGCC  | 1131 |
| SLC_cDNA   | -----                                                         |      |
| SLC_genome | GATTATATTATTGATTCATCTATGAATTATTTGGTGTATAAAATGTCAGAGAATTGTGAA  | 1191 |
| SLC_cDNA   | -----                                                         |      |
| SLC_genome | AAAATGTCTATCATTTCTTTGAGTTCATGGTGACATCATGTATGACACAAAAGCTTCAA   | 1251 |
| SLC_cDNA   | -----                                                         |      |
| SLC_genome | TCCTCACACTCAAGAAGCTGCAACCAGCAAATGTTTAGCTTTTATACTTAAAAAAAATG   | 1311 |
| SLC_cDNA   | -----                                                         |      |
| SLC_genome | GTTAAAAATGATAAAATGAAAATAATAGACATAATCATCGCAGCTCTACAGATGCATTAGG | 1371 |
| SLC_cDNA   | -----                                                         |      |
| SLC_genome | CAGATAGACAGTAATAATATGTAGACAGACTGTGTGTATTTATAGTCTATAGGTATCATT  | 1431 |
| SLC_cDNA   | -----                                                         |      |
| SLC_genome | TGCTATATTGTATCTATATGTAATTCTTGTAATAAATACTTTCACCAGGGTGTGGTGGGC  | 1491 |
| SLC_cDNA   | -----                                                         |      |
| SLC_genome | TGTTTCTACCGTTCTGCTCTGTGTAGGTTTAGATGAGGATATGTGCAGGCTGCTTCTATC  | 1551 |
| SLC_cDNA   | -----                                                         |      |
| SLC_genome | AGTAGCTACACTACATAAACTTGACTGATAAACTGACTGGGGGTGGATAAATACAGTATG  | 1611 |
| SLC_cDNA   | -----                                                         |      |
| SLC_genome | ATGCAATCCCATACAATAGATAGACAAAGCTTGAATTATTTGTAGTTTGGTTTGTTTTG   | 1671 |
| SLC_cDNA   | -----                                                         |      |
| SLC_genome | TGTTGGATTGTACAGTATAACATCAGGTGTGTTATCTTTGACTGTGTATATGTAGTCATG  | 1731 |
| SLC_cDNA   | -----GTCTGGGTCTGTCCCAAGATGTAGC                                | 522  |
| SLC_genome | TATTCTTTCTGGGTATGTTTGTGTCTCTCTCTCAGGCTCTGGGTCTGTCCCAAGATGTAGC | 1791 |
|            | *****                                                         |      |
| SLC_cDNA   | AGGGGCAACATTTATGGCAGCTGGGAGTTCTGCACCTGAACTGGTCACAGCCTTTCTGG-  | 581  |
| SLC_genome | AGGAGCAACATTTATGGCAGCTGGGAGTTCTGCACCTGAACTGGTCACAGCCTTTCTGGG  | 1851 |
|            | *** *****                                                     |      |

|            |                                                               |      |
|------------|---------------------------------------------------------------|------|
| SLC_cDNA   | -----                                                         | 583  |
| SLC_genome | TAATCACACATTAGTATAATAATTACAACCTACCAGTGTTTGATGATGACACCGCCATCAT | 1911 |
| SLC_cDNA   | -----                                                         |      |
| SLC_genome | CATCACTGTCACTGTCTCCTTACCCGACCAGATGAACTGTGACTTTAACGCCAGATGGGA  | 1971 |
| SLC_cDNA   | -----                                                         |      |
| SLC_genome | ACAGAAAGACACTGTGGCCTGTGATTAGCACATATTTCTCTAGGCACCTTATGTGCTCC   | 2031 |
| SLC_cDNA   | -----                                                         |      |
| SLC_genome | CCAGGCCTTTCTCATCCTCCTCATCGATGCTGCCACGTTGTCTCATTGCCTACTGTGCC   | 2091 |
| SLC_cDNA   | -----GTGTGTTTGTGAC                                            | 594  |
| SLC_genome | ATGACGTGTGTCTGTGTGTTTTTTTTTTTATGTGTTTGGCACGACAGGTGTGTTGTAC    | 2151 |
|            | ***** **                                                      |      |
| SLC_cDNA   | AAAGGGAGACATCGGGGTGAGCACCATTGTGGGGTCAGCAGTCTACAACCTCTTAGGAAT  | 654  |
| SLC_genome | AAAGGGAGACATCGGGGTGAGCACCATTGTGGGGTCAGCAGTCTACAACCTCTTAGGAAT  | 2211 |
|            | *****                                                         |      |
| SLC_cDNA   | CTGCGCTGCATGTGGACTCTTGGCCTCTATG-----                          | 685  |
| SLC_genome | CTGCGCTGCATGTGGACTCTTGGCCTCTATGGTACATTATGACACACACACAGTATTCA   | 2271 |
|            | *****                                                         |      |
| SLC_cDNA   | -----                                                         |      |
| SLC_genome | GACAAAGATCACACATCAACAACCTGTTTCATACAATAAAGAAGCACCTTTACTAGGTCA  | 2331 |
| SLC_cDNA   | -----                                                         |      |
| SLC_genome | GAGCGGAAGCATCCTTGTTTACACCGTGTTTATGCGGTGTAAACATTTATTTTGT       | 2391 |
| SLC_cDNA   | -----GCAGGGCGTCTCACCTGTTGGCCTCTGTTTCAGGGACTGCCTGGCATATGCTAT   | 738  |
| SLC_genome | CCTTCAGGCAGGGCGTCTCACCTGTTGGCCTCTGTTTCAGGGACTGCCTGGCATATGCTAT | 2451 |
|            | *****                                                         |      |
| SLC_cDNA   | CAGCGTTGCTGCTGTTATTGCCATAATATCCGACAACAAGGTGTATTG-----         | 786  |
| SLC_genome | CAGCGTTGCTGCTGTTATTGCCATAATATCCGACAACAAGGTGTATTGGTGAGTGTGGGC  | 2511 |
|            | *****                                                         |      |
| SLC_cDNA   | -----                                                         |      |
| SLC_genome | AGTGATTGAGCATGACCTACCTGTAAAAGCGGTGTATACAGTTGTTTATTGTATCCTGT   | 2571 |
| SLC_cDNA   | -----                                                         |      |
| SLC_genome | GACTATGGACAGCATAAATGTAAGAGCATAAAAATAGATCAGATGTAATGAAAGAACCGA  | 2631 |
| SLC_cDNA   | -----                                                         |      |
| SLC_genome | GTGGCACAGTGCTGTGACTCATTGGCTTTTATTACACTGAAAGTACAATACAGTGGAATG  | 2691 |
| SLC_cDNA   | -----                                                         |      |
| SLC_genome | ACACCATATCACATCATAACAAGCTAATCCAGTGTTTATGACATGTTGGCACATATATCT  | 2751 |
| SLC_cDNA   | -----                                                         |      |
| SLC_genome | GAATAATTTGTTATGAATGTTTGTAGTTTATTAAGATCAAGATATGGAGTTTGTAAAA    | 2811 |

|            |                                                               |      |
|------------|---------------------------------------------------------------|------|
| SLC_cDNA   | -----                                                         |      |
| SLC_genome | GCTAAACTAGATATTTAGCTTTAACATTAAAAAGTGATCAAATCAAATTGTAATAAAATG  | 2871 |
| SLC_cDNA   | -----                                                         |      |
| SLC_genome | CAAACCAAGTGTTTGGCTTAACAAAAAATCATTTTGTCTGAATATATTCATTTGTAAAA   | 2931 |
| SLC_cDNA   | -----                                                         |      |
| SLC_genome | AAAAAAAAAAAAAATCACCTTGTTAGACATGCAGCATTCCTTCAAAGTCATTCATAAATA  | 2991 |
| SLC_cDNA   | -----GTATGAAGCTGCCAGCCTGCTGCTGGTCTACAGTGTCTACATCG             | 830  |
| SLC_genome | TACGTGTTGTTTACAGGTATGAAGCTGCCAGCCTGTTGCTGGTCTACAGTGTCTACATCG  | 3051 |
|            | *****                                                         |      |
| SLC_cDNA   | TGGTTCTGTGCTTTGACCTTCGCATCAGCGAGTTCGTCCTGAGGAAGCTGAGCCCGTGCT  | 890  |
| SLC_genome | TGGTTCTGTGCTTTGACCTTCGCATCAGCGAGTTCGTCCTGAGGAAGCTGAGCCCGTGCT  | 3111 |
|            | *****                                                         |      |
| SLC_cDNA   | GCACCTGTCTGGGCAAAGGATCGGGGGAGAAGACCGAGACGCAGCCGCTGATGGGCTGGA  | 950  |
| SLC_genome | GCACCTGTCTGGGCAAAGGATCGGGGGAGAAGACCGAGACGCAGCCGCTGATGGGCTGGA  | 3171 |
|            | *****                                                         |      |
| SLC_cDNA   | ACGACGACACGAGTCTGCGAGTCCACAGTCGCTCCAGGACGGACAGCGGGATCTTCCAAG  | 1010 |
| SLC_genome | ACGACGACACGAGTCTGCGAGTCCACAGTCGCTCCAGGACGGACAGCGGGATCTTCCAAG  | 3231 |
|            | *****                                                         |      |
| SLC_cDNA   | ACGACTCGGGGTACTCTCACCTCTCTCTCAGCCTGCATGGTCTCAATGAGATACCTGAAG  | 1070 |
| SLC_genome | ACGACTCGGGGTACTCTCATCTCTCTCTCAGCCTGCATGGTCTCAATGAGATACCTGAAG  | 3291 |
|            | *****                                                         |      |
| SLC_cDNA   | -----                                                         |      |
| SLC_genome | GTGAGATGCAAACCTCGCAGAGACTATGACACTCAGTTTAGCACTCGCTTTTCAACATGAT | 3351 |
| SLC_cDNA   | -----                                                         |      |
| SLC_genome | GTGTACAGCTGTTGACACGCACTCGCTTGCTTTGGCCTTTATGACCCCTGACAATATGA   | 3411 |
| SLC_cDNA   | -----AGCGTAAAAGTGTTTGT                                        | 1088 |
| SLC_genome | CAAGGACCCTACTCATAAACCGTTTGTCTCCTTGACCCAGAGCGTAAAAGTGTTTGT     | 3471 |
|            | *****                                                         |      |
| SLC_cDNA   | CTGTGCCGGAGAGCGACTTTAAAAGGATCCTCTGGGTCTGTCTCTACCCATCATCATTC   | 1148 |
| SLC_genome | CTGTGCCGGAGAGCGACTTTAAAAGGATCCTCTGGGTCTGTCTCTACCCATCATCATTC   | 3531 |
|            | *****                                                         |      |
| SLC_cDNA   | TGTTCTTCTGACCATCCCTGACTGCAGAAGAAGTTCTGGAAGAAGTGGTTCATGATAA    | 1208 |
| SLC_genome | TGTTCTTCTGACCATCCCTGACTGCAGAAGAAGTTCTGGAAGAAGTGGTTCATGATAA    | 3591 |
|            | *****                                                         |      |
| SLC_cDNA   | CCTTCTTCATGTCAGCTGTCTGGATCTCAGGTTTCACATATCTGCTGGTGTGGATGGTCA  | 1268 |
| SLC_genome | CCTTCTTCATGTCAGCTGTCTGGATCTCAGGTTTCACATATCTGCTGGTGTGGATGGTCA  | 3651 |
|            | *****                                                         |      |
| SLC_cDNA   | CTATTGTCG-----                                                | 1277 |
| SLC_genome | CTATTGTCGGTAAGCGCCGTATCTACGCATTGCGGTGATGAGCTTTGTTCAATCCATAT   | 3711 |
|            | *****                                                         |      |
| SLC_cDNA   | -----                                                         |      |

|            |                                                               |      |
|------------|---------------------------------------------------------------|------|
| SLC_genome | ATTTCCTTTAAGTCTTTTGATGATATGATCAGCAGGTGTAAGTCAGCCTTGTCAACTCAAT | 3771 |
| SLC_cDNA   | -----                                                         |      |
| SLC_genome | GAGTTATGGAGCCTTTCTGGATCACAAGTGTGTTGAACTTGTGAGAAAAATGTGTGTGAT  | 3831 |
| SLC_cDNA   | -----                                                         |      |
| SLC_genome | TCGCAGAGTAGAATCACATGTCGGTCTGCTGGCTAATTCCTGAGATGCCATTGTCCTGGA  | 3891 |
| SLC_cDNA   | -----                                                         |      |
| SLC_genome | AAGTTAAGAGGGGGGTTATTGTAGCTCCAGTGGGCCATGTGCCTACCTAGCCACAGCAGG  | 3951 |
| SLC_cDNA   | -----                                                         |      |
| SLC_genome | ATTACAGCCTGCTTCACCCCTTAAGGAAACACAGTCATGTGAGCCCTGGGTGTATATAC   | 4011 |
| SLC_cDNA   | -----                                                         |      |
| SLC_genome | AGAAGTACCCAAAGGCACGGGTCCAAGAACAGTTTCACCCACCCCCCATCTACAACTT    | 4071 |
| SLC_cDNA   | -----                                                         |      |
| SLC_genome | GAGATGTAAACTATAAAGCTGACTAAGATCAGGCTAAAAGGGCAGCTTCATCATGTGACA  | 4131 |
| SLC_cDNA   | -----                                                         |      |
| SLC_genome | GTGGTAGGTCTACTGAAGTATAATGAGATTATTATTCCAAAGTCATAACATAGGCTCAGA  | 4191 |
| SLC_cDNA   | -----                                                         |      |
| SLC_genome | TGGAGGGAGAGTTTAGTCTTATGAAAGAGCAGACGTGAGGTCAGGCAGATACAACGCAA   | 4251 |
| SLC_cDNA   | -----                                                         |      |
| SLC_genome | CATACAGTATGCGATTGATTATGTTTTCCCTGTGGCTGTTCTGTTCTGCTCAGTGACATC  | 4311 |
| SLC_cDNA   | -----                                                         |      |
| SLC_genome | TCAGTAACATCATACTGCATGATTTCAGACGTCTCACGAAAGTCTACAGGGAGGATGTGGA | 4371 |
| SLC_cDNA   | -----                                                         |      |
| SLC_genome | TTCATTTAAAGTGTTAAAACAGTGGGTAAATATCCAGGTGCTAGTTGAGCTTAAGACTGC  | 4431 |
| SLC_cDNA   | -----                                                         |      |
| SLC_genome | GGGTGGGGCTCTGCTGGGTGAACGGGTCTTATTACGTCAATATTTCTAAAATCCCGACT   | 4491 |
| SLC_cDNA   | -----                                                         |      |
| SLC_genome | AAAGCCCCGCTCTTGTGATCATTTGTTAACCTATCGCCACATTTAACATCATCAGCTG    | 4551 |
| SLC_cDNA   | -----                                                         |      |
| SLC_genome | ATGACGATGTGGGAGGAGTCTGACTTTGGTTGGCGTTTGTTTACGCAGGTGAGACGCTC   | 4611 |
|            | ***** ***                                                     |      |
| SLC_cDNA   | -----                                                         |      |
| SLC_genome | -----GTGAGACACTC                                              | 1288 |
| SLC_cDNA   | GACATCCCCGATACGGTGATGGGACTCACTCTGATGGCTGCTGGAACCAGCATACCTGAC  | 1348 |
| SLC_genome | GACATCCCCGATACGGTGATGGGACTCACTCTGATGGCTGCTGGAACCAGCATACCTGAC  | 4671 |
|            | *****                                                         |      |

|            |                                                                        |      |
|------------|------------------------------------------------------------------------|------|
| SLC_cDNA   | ACGGTAGCCAGTGTGATGGTGGCCAGAGAAG-----                                   | 1379 |
| SLC_genome | ACGGTAGCCAGTGTGATGGTGGCCAGAGAAGGTAACATCAGTGTTCATGTTTATCAGCTAC<br>***** | 4731 |
| SLC_cDNA   | -----                                                                  |      |
| SLC_genome | AGTGTATAGTAGTTTGAGGTGCCTCATAACAAAAATATCTTTTACTTCACTACTATTA             | 4791 |
| SLC_cDNA   | -----                                                                  |      |
| SLC_genome | AGAAAATTCCTCTTTTATGAGCAACACTCCTGATTAATTCTCACAATTATATTCAAATCT           | 4851 |
| SLC_cDNA   | -----                                                                  |      |
| SLC_genome | GCCTAAAATGGTCATTTTTTAACCAGAGCTTTGATGTTGAGGTATTGGAGTCTTTCTACTT          | 4911 |
| SLC_cDNA   | -----                                                                  |      |
| SLC_genome | GTAACATATTAAAGTGATAACTATTGACTAATGATTAGTTTCTAACTCAGATTCCCAT             | 4971 |
| SLC_cDNA   | -----                                                                  |      |
| SLC_genome | CTGCCACTTTGAAAATGACTTTAATAGCCATATTCTGGGCATATGTAAATACTTTTCATT           | 5031 |
| SLC_cDNA   | -----GGAAAGCCGACATGGCGATGTCCAACATCGTGGGTTCAAATGTAT                     | 1424 |
| SLC_genome | TTCTCTGCTGAACAGGAAAAGCCGACATGGCGATGTCCAACATCGTGGGTTCAAATGTAT<br>*****  | 5091 |
| SLC_cDNA   | TCGACATGCTCTGCCTCGGCCTGCCTTGGTTCATCAAGACCGCATTTGTGGACACCAACG           | 1484 |
| SLC_genome | TCGACATGCTCTGCCTCGGCCTGCCTTGGTTCATCAAGACCGCATTCGTGGACACCAACG<br>*****  | 5151 |
| SLC_cDNA   | ACCCCGTAGAGGTCACCAGCACCGGACTGTTCTTCATTTCTCCCACTCCTCCTTTCAA             | 1544 |
| SLC_genome | ACCCCGTAGAGGTCACCAGCACCGGACTGTTCTTCATTTCTCCCACTCCTCCTTTCAA<br>*****    | 5211 |
| SLC_cDNA   | TCCTCTTCCTTTTGTGCGCGTCCATGTGAACGGTTGGAAGTTGGACTGGAACTGGGAA             | 1604 |
| SLC_genome | TCCTCTTCCTTTTGTGCGCGTCCATGTGAACGGTTGGAAGTTGGACTGGAACTGGGAA<br>*****    | 5271 |
| SLC_cDNA   | TTGTTTCCCTCATCTGCTACATCCTCTGTGCCACTCTGTCCATCCTGTATGAGCTGGGGA           | 1664 |
| SLC_genome | TTGTTTCCCTCATCTGCTACATCCTCTTGCCACTCTGTCCATCCTGTATGAGCTGGGGA<br>*****   | 5331 |
| SLC_cDNA   | TTATTGGCAATAATCCCATAGACTGTGCAGTGACTGAACTTG-CCTTCCAGGACCAA              | 1723 |
| SLC_genome | TTATTGGCAATAATCCCATAGACTGTGCAGTGACTGAACTTGACCTTCCAGGACCAA<br>*****     | 5391 |
| SLC_cDNA   | AGCCATATTTACCCAAGACTCTTAATAACAGTCCAAAAACAAATAAAATGTTTTAA-G             | 1782 |
| SLC_genome | AGCCATATTTACCCAAGACTCTTAATAACAGTCCAAAAACAAAGAAAAATGTTTTAAAG<br>*****   | 5451 |
| SLC_cDNA   | CCTGTAAGATCTTCAAATATCAAAGACAAGGAAGCATGAGCCCACTCTAACACACATTT            | 1842 |
| SLC_genome | CCTGTAAGATCTTCAAATATCAA-GACAAGGAAGCATGAGCCCACTCTAACACACATTT<br>*****   | 5510 |
| SLC_cDNA   | AAAGATATTGTGTCACAGAAGACGTGCTGGTCACATCTCAGGAAGAGGATGATCTCTATA           | 1902 |
| SLC_genome | AAAGATATTGTGTCACAGAAGACGTGCTGGTCACATCTCAGGAAGAGGATGATCTCTATA<br>*****  | 5570 |
| SLC_cDNA   | ATAAAATGTATATTTACAAATAGGTGCAATGTGCCAAAGATCTTGATACTCTTGTGTAT            | 1962 |
| SLC_genome | ATAAAATGTATATTTACAAATAGGTGCAATGTGCCAAAGATCTTGATACTCTTGTGTAT<br>*****   | 5630 |

```
SLC_cDNA      TCATATAAGCCTATGACCTGGATTGTTACACTATTAAAACACATTATCCATTAAATTTT 2022
SLC_genome    TCATATAAGCCTATGACCTGGATTGTTACACTATTAAAACGCATTATCCATTAAATTCT 5690
*****
```

```
SLC_cDNA      AAGATGCCCTACTAAAGGCACATAAACAGAGAATGACAGGAATGAAGTAATAAAGGTGTC 2082
SLC_genome    AAGATGCCCTACTAAAGGCACATAAACAGAGAATGACAGGAATGAAGTAATAAAGGTGTC 5750
*****
```

```
SLC_cDNA      CAAAAAAAAAAAAAAAAAAAAAAAAAAAA 2108
SLC_genome    CA----- 5752
**
```

ATG -start codon; TGA - stop codon

SLC: *slc24a5*
